# Supplementary material for: O-GlcNAcylation Inhibits Endocytosis of Amyloid Precursor Protein by Decreasing Its Localization in Lipid Raft Microdomains
Source: MDPI journal article supplement (doi:10.3390/membranes11120909), 2021-11-23
Supplement: s1 [file s1]

## **Supplementary materials**

### **O-GlcNAcylation inhibits endocytosis of amyloid precursor protein by decreasing its localization in lipid raft microdomains.**

Oh-Hoon Kwon<sup>1,#</sup>, Yoon Young Cho<sup>1,#</sup>, Jung Hee Lee<sup>2</sup>, Sungkwon Chung<sup>1,\*</sup>

<sup>1</sup> Department of Physiology, Sungkyunkwan University School of Medicine, Suwon 16419, South Korea

<sup>2</sup> Department of Radiology, Samsung Medical Center, Sungkyunkwan University School of Medicine, Seoul 06351, South Korea

\*Correspondence to:

Professor Sungkwon Chung, PhD.

Department of Physiology, Sungkyunkwan University School of Medicine

Suwon 440-746, South Korea

schung@skku.edu

Tel: 82-31-299-6103

Fax: 82-31-299-6129

<sup>#</sup>These authors contributed equally

**Figure S1**

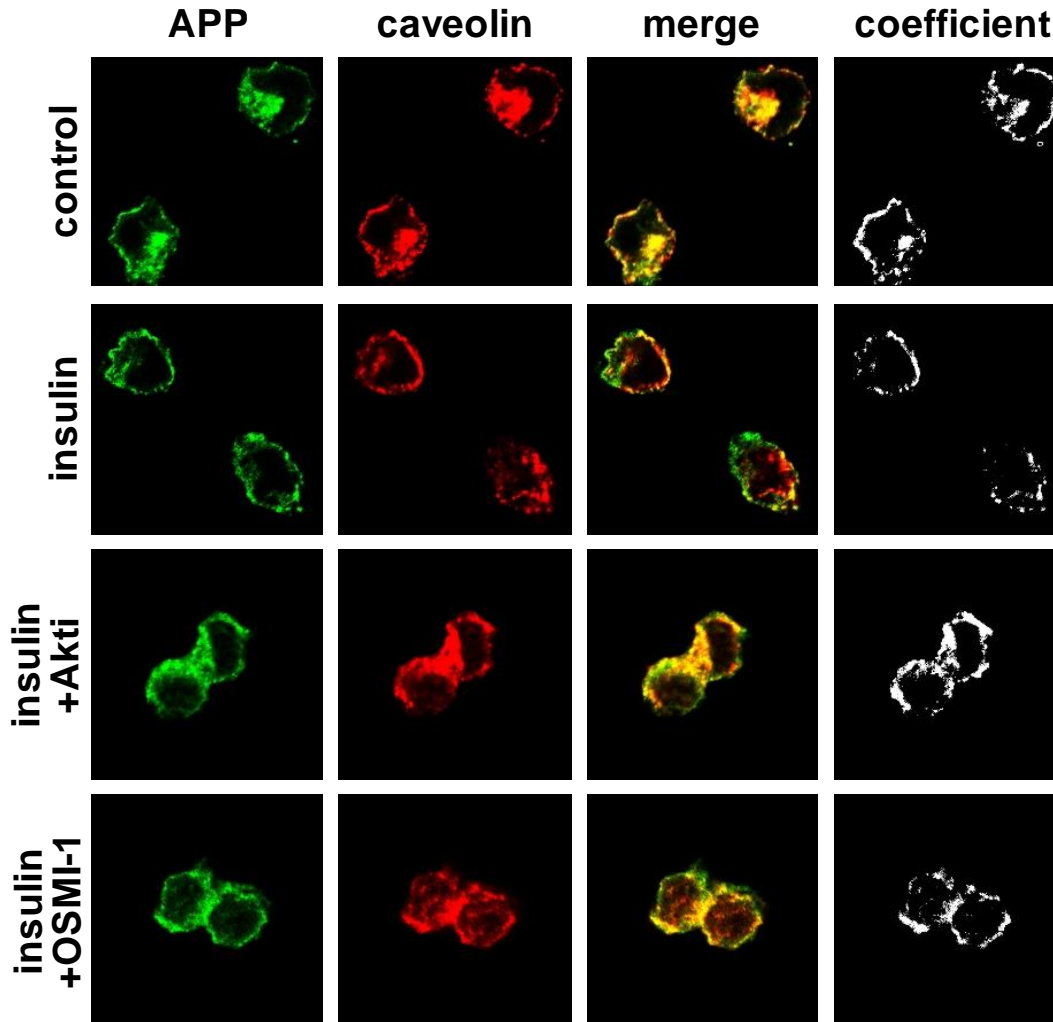

**Figure S1.** Insulin reduces APP localization in lipid raft microdomains. SH-SY5Y-APP/BACE1 cells were incubated with 1  $\mu$ M insulin for 2 h. Akt inhibitor (Akti, 10  $\mu$ M) or OGT inhibitor (OSMI-1, 50  $\mu$ M) was also used. After washing, cells were incubated with 6E10 antibody at 4°C to label APP at the plasma membrane. Cells were then fixed, permeabilized, and incubated with caveolin antibody. After labeling fluorescent conjugated secondary antibodies, typical immunoreactivities of APP (green) and caveolin (red) are measured. Scale bar is 10  $\mu$ m.

**Figure S2**

**a)**

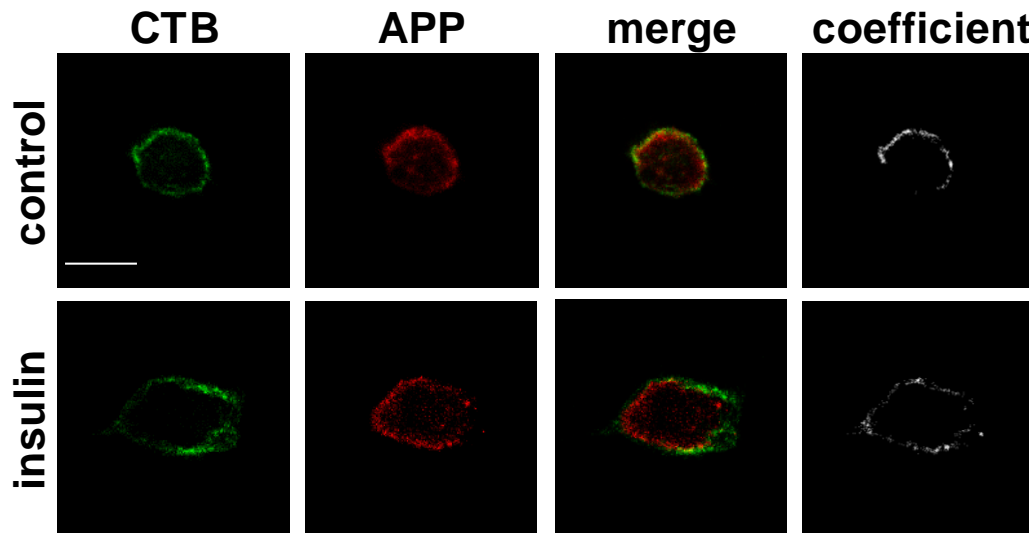

**b)**

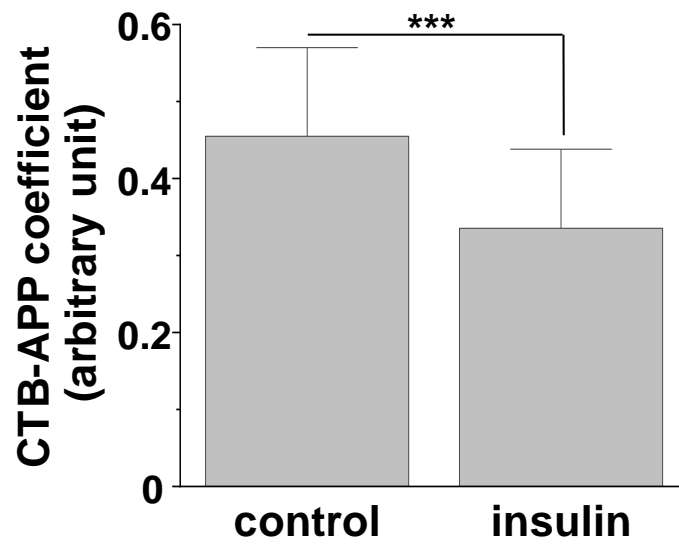

**Figure S2.** Insulin decreases the colocalization coefficients of APP and cholera toxin B. SH-SY5Y-APP/BACE1 cells were incubated with 1  $\mu$ M insulin. After washing, cells were incubated with 6E10 antibody and 10  $\mu$ g/ml FITC-conjugated cholera toxin B subunits (CTB; Sigma, #C1655) at 4°C for 1 h to label APP and lipid raft microdomains, respectively. Cells were then fixed and incubated with fluorescent conjugated secondary antibody. (a) Typical immunoreactivities of CTB (green) and APP (red) are shown. (b) The intensities were quantified as the arbitrary unit by LSM710 microscope (Zeiss) using Zen software (n=20, number of cells. Randomly selected 5 cells in 4 different experiments.). The threshold was automatically set as the 60-100% value. (Manders' M2 coefficient: control,  $0.35007 \pm 0.02381$ ; insulin,  $0.21993 \pm 0.01285$ ; fraction of B overlapping A, image A: CTB, image B: APP). Scale bar is 10  $\mu$ m. One way ANOVA: \*\*\*,  $p < 0.001$ . All values represent mean  $\pm$  SEM.

**Figure S3**

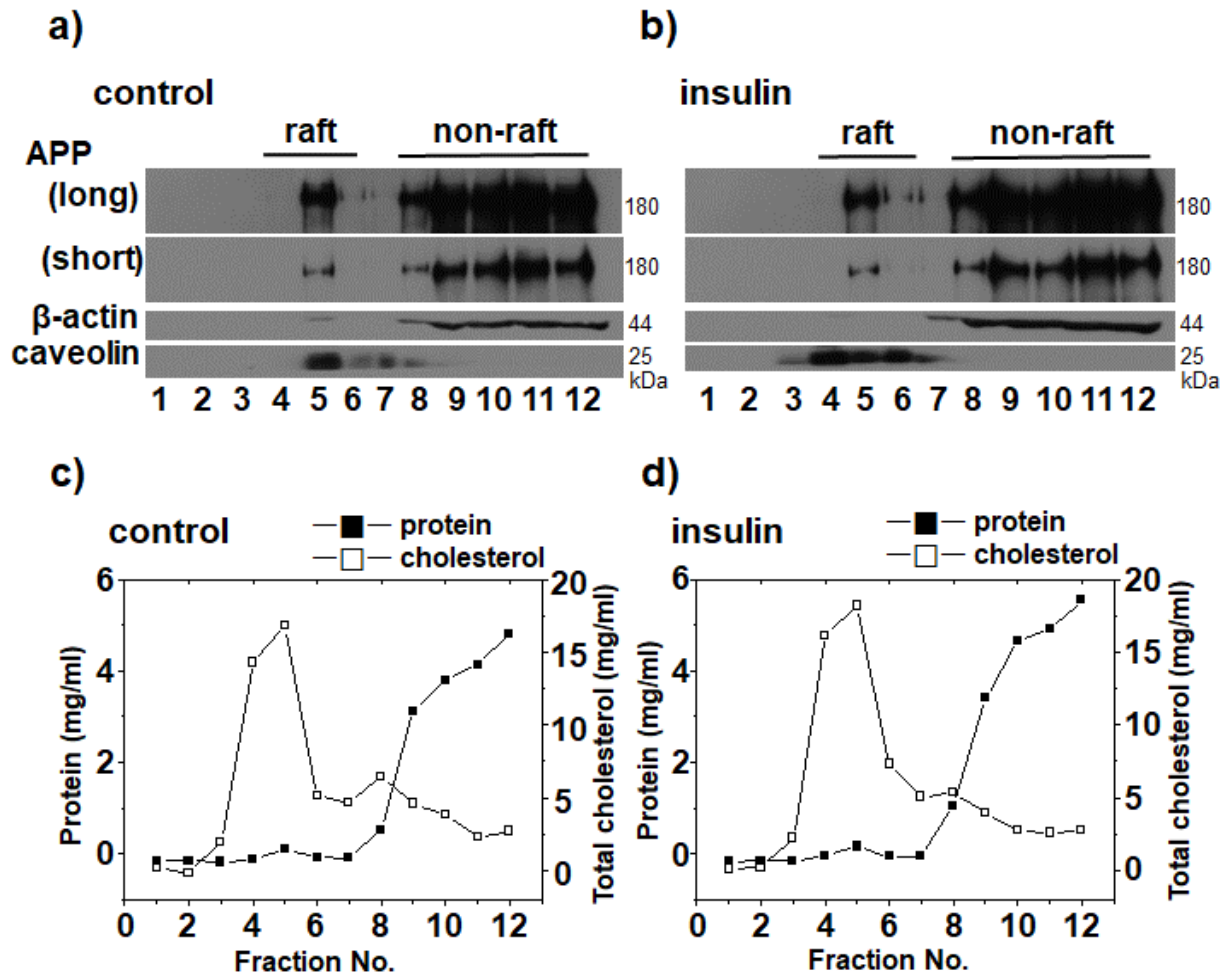

**Figure S3.** The distribution of APP, proteins, and cholesterol levels in 12 fractions obtained from discontinuous sucrose gradients. SH-SY5Y-APP/BACE1 cells were homogenized with sodium carbonate buffer as described in Methods. The cell lysates were loaded on discontinuous sucrose density gradients. The gradients were harvested from top to bottom to obtain 12 fractions, and equal volumes of each fraction were loaded on SDS gels. (a, b) A representative western blot shows APP,  $\beta$ -actin, and caveolin (lipid raft marker) expression levels. (c, d) The levels of cholesterol and proteins in each fraction were analyzed using Amplex Red cholesterol assay kit and Bradford method, respectively.

**Figure S4**

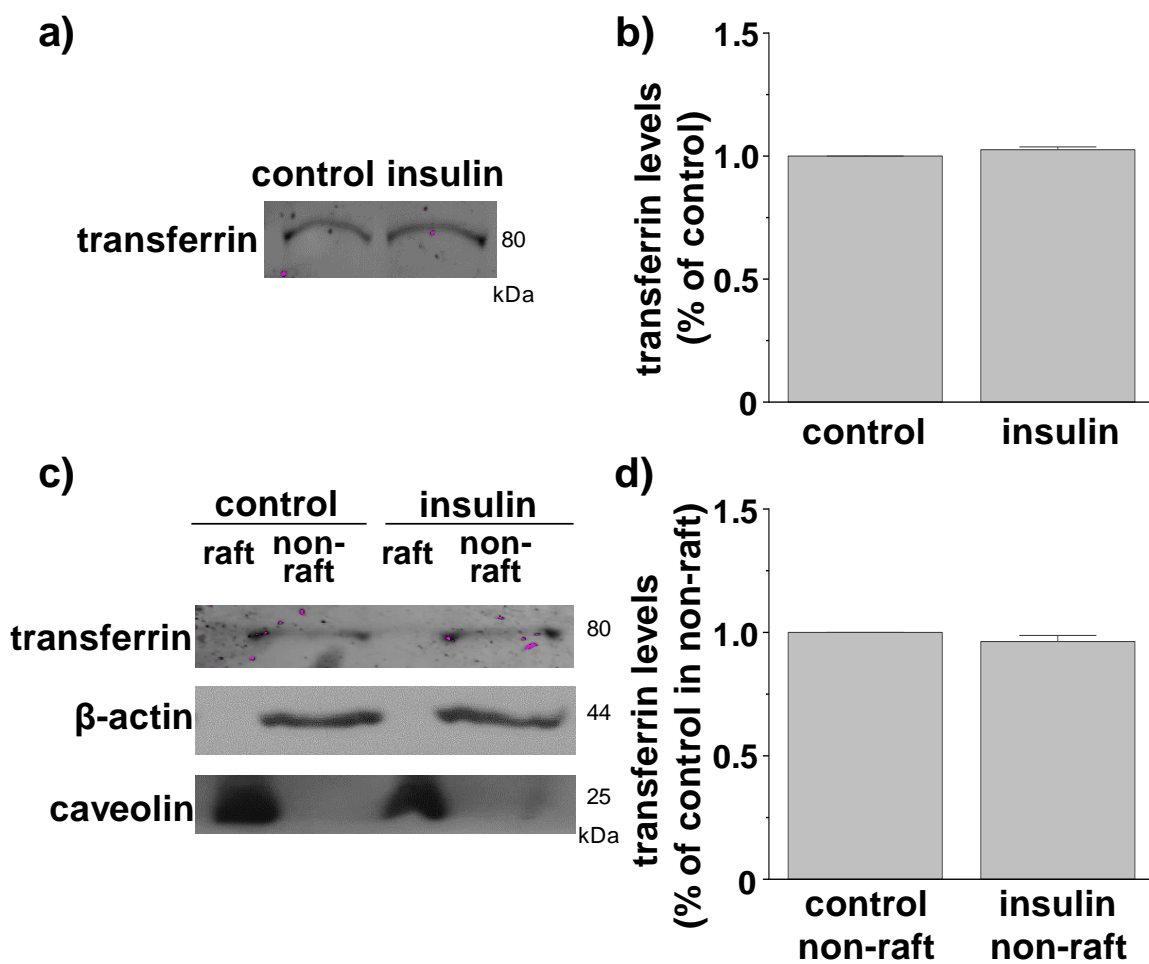

**Figure S4.** The effect of insulin on transferrin internalization. (a, b) SH-SY5Y-APP/BACE1 cells were incubated with 1  $\mu$ M insulin. Level of transferrin was not changed by insulin when Alexa Fluor 488-transferrin was used (n=3, number of independent cell culture preparations). (c, d) SH-SY5Y-APP/BACE1 cells were incubated with Alexa Fluor 488-transferrin at 37°C for 5 min, following remaining transferrin at the plasma membrane was stripped by acidic buffer. Equal amount of proteins from cell lysates were loaded on discontinuous sucrose density gradients as described in Method section to obtain 12 fractions. We combined fractions 4 to 6 (lipid raft fractions) or fractions 8 to 12 (non-raft fractions). Proteins in the same amount from lipid raft and non-raft fractions were loaded for western blots to detect internalized transferrin. Transferrin fluorescent bands were detected only in non-raft fractions, and the levels of transferrin were not altered by insulin (n=3, number of independent cell culture preparations). A representative western blot shows APP,  $\beta$ -actin, and caveolin (lipid raft marker).

**Figure S5**

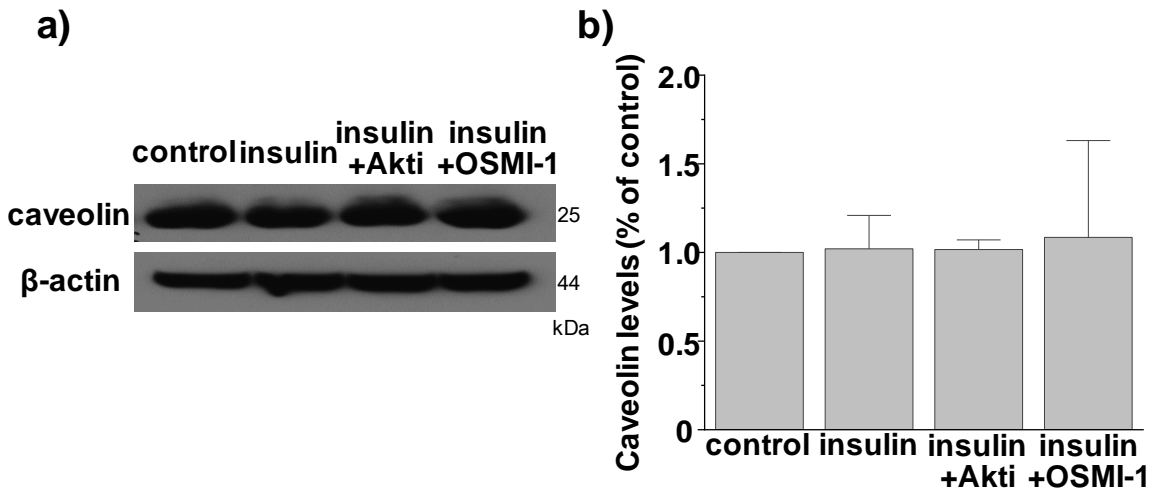

**Figure S5.** The expression levels of caveolin were not changed by insulin, Akti, and OSMI-1. SH-SY5Y-APP/BACE1 cells were incubated with 1  $\mu$ M insulin for 2 h. Akt inhibitor (Akti, 10  $\mu$ M) or OGT inhibitor (OSMI-1, 50  $\mu$ M) was also used. (a) A representative western blot shows the levels of total caveolin.  $\beta$ -actin was used as a loading control. (b) The levels of total caveolin were not changed in different conditions (n=7, number of independent cell culture preparations).

**Figure S6**

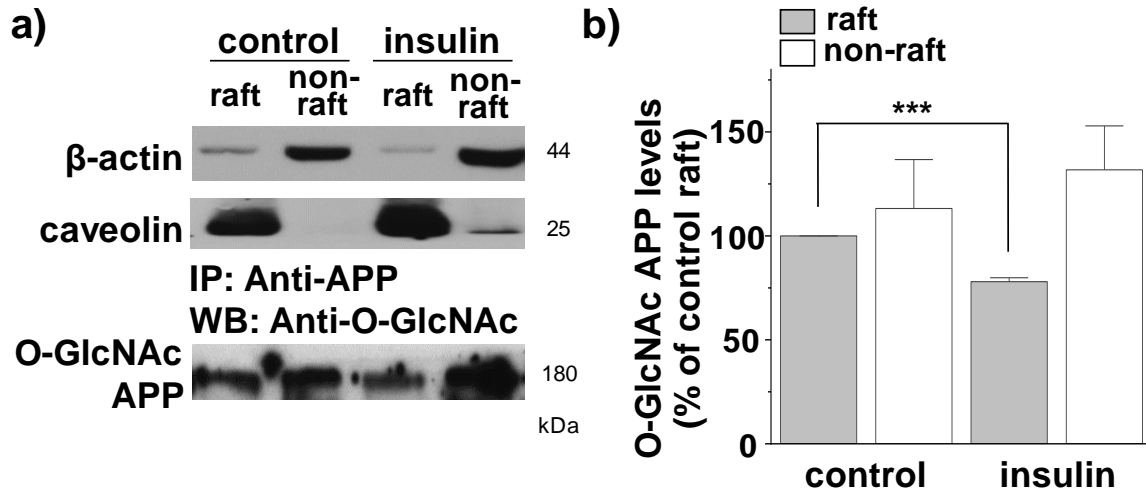

**Figure S6.** The effects of insulin on the translocation of O-GlcNAcylated APP into non-raft fractions by using immunoprecipitation with APP antibody. (a) SH-SY5Y-APP/BACE1 cells were incubated with 1  $\mu$ M insulin for 2 h. Cells were then harvested, homogenized, and sonicated. Equal amount of proteins from cell lysates were loaded on discontinuous sucrose density gradients as described in Method section to obtain 12 fractions. We combined fractions 4 to 6 (lipid raft fractions) or fractions 8 to 12 (non-raft fractions). Lipid raft and non-raft fractions were immunoprecipitated with APP antibody and then probed with O-GlcNAc antibody (n=3, number of independent cell culture preparations). Caveolin was used as a lipid raft marker. (b) O-GlcNAc APP levels were compared to O-GlcNAc APP level in raft fraction of control cells. One-way ANOVA: \*\*\*,  $p < 0.001$ . All values represent mean  $\pm$  SEM.

**Figure S7**

**a)**

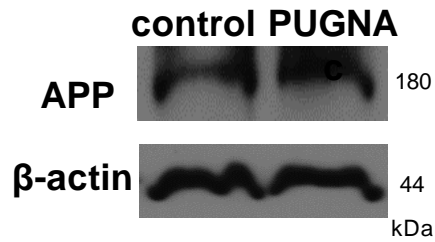

**b)**

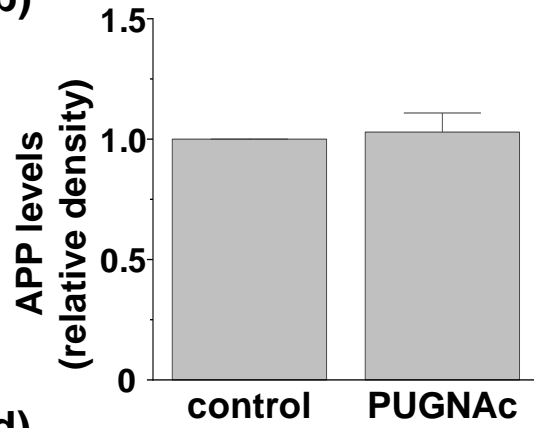

**c)**

IP: Anti-O-GlcNAc

WB: Anti-APP

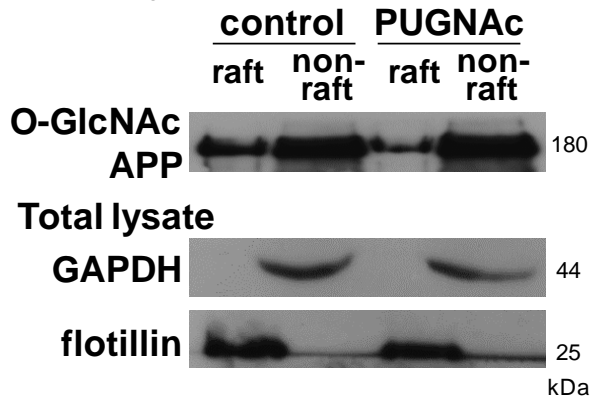

**d)**

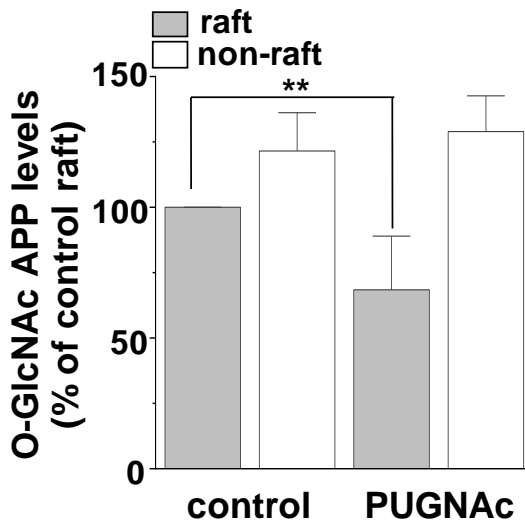

**Figure S7.** The effects of PUGNAc on the translocation of O-GlcNAcylated APP into non-raft fractions. SH-SY5Y-APP/BACE1 cells were incubated with 50  $\mu$ M PUGNAc for 24 h. (a, b) When cells lysates were loaded for western blotting, APP level was not changed by PUGNAc (n=3, number of independent cell culture preparations). (c, d) Following PUGNAc treatment, cells were harvested, homogenized, and sonicated. Equal amount of proteins from cell lysates were loaded on discontinuous sucrose density gradients as described in Method section to obtain 12 fractions. We combined fractions 4 to 6 (lipid raft fractions) or fractions 8 to 12 (non-raft fractions). Lipid raft and non-raft fractions were immunoprecipitated with O-GlcNAc antibody and then probed with APP antibody (n=3, number of independent cell culture preparations). Caveolin was used as a lipid raft marker. O-GlcNAc APP levels were compared to O-GlcNAc APP levels in raft fraction of control cells. One-way ANOVA: \*\*,  $p < 0.01$ . All values represent mean  $\pm$  SEM.

**Figure S8**

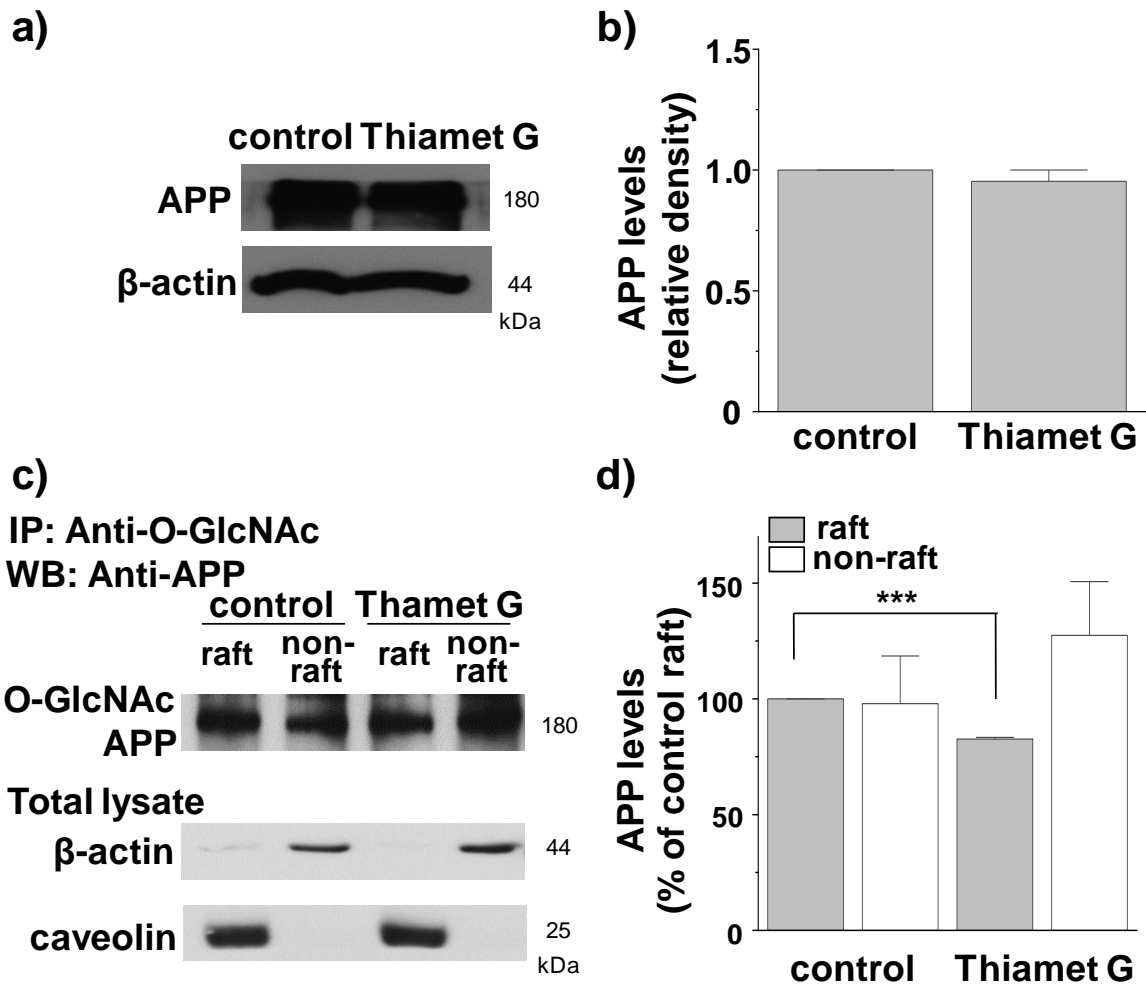

**Figure S8.** The effects of Thiamet G on the translocation of O-GlcNAcylated APP from lipid raft to non-raft fractions. SH-SY5Y-APP/BACE1 cells were incubated with 10  $\mu$ M Thiamet G for 24 h. (a, b) When cells lysates were loaded for western blotting, APP level was not changed by Thiamet G (n=3, number of independent cell culture preparations). (c, d) Following Thiamet G treatment, cells were harvested, homogenized, and sonicated. Equal amount of proteins from cell lysates were loaded on discontinuous sucrose density gradients as described in Method section to obtain 12 fractions. We combined fractions 4 to 6 (lipid raft fractions) or fractions 8 to 12 (non-raft fractions). Lipid raft and non-raft fractions were immunoprecipitated with O-GlcNAc antibody and then probed with APP antibody (n=3, number of independent cell culture preparations). Caveolin was used as a lipid raft marker. O-GlcNAc APP levels were compared to O-GlcNAc APP levels in raft fraction of control cells. One-way ANOVA: \*\*\*,  $p < 0.001$ . All values represent mean  $\pm$  SEM.

**Figure S9**

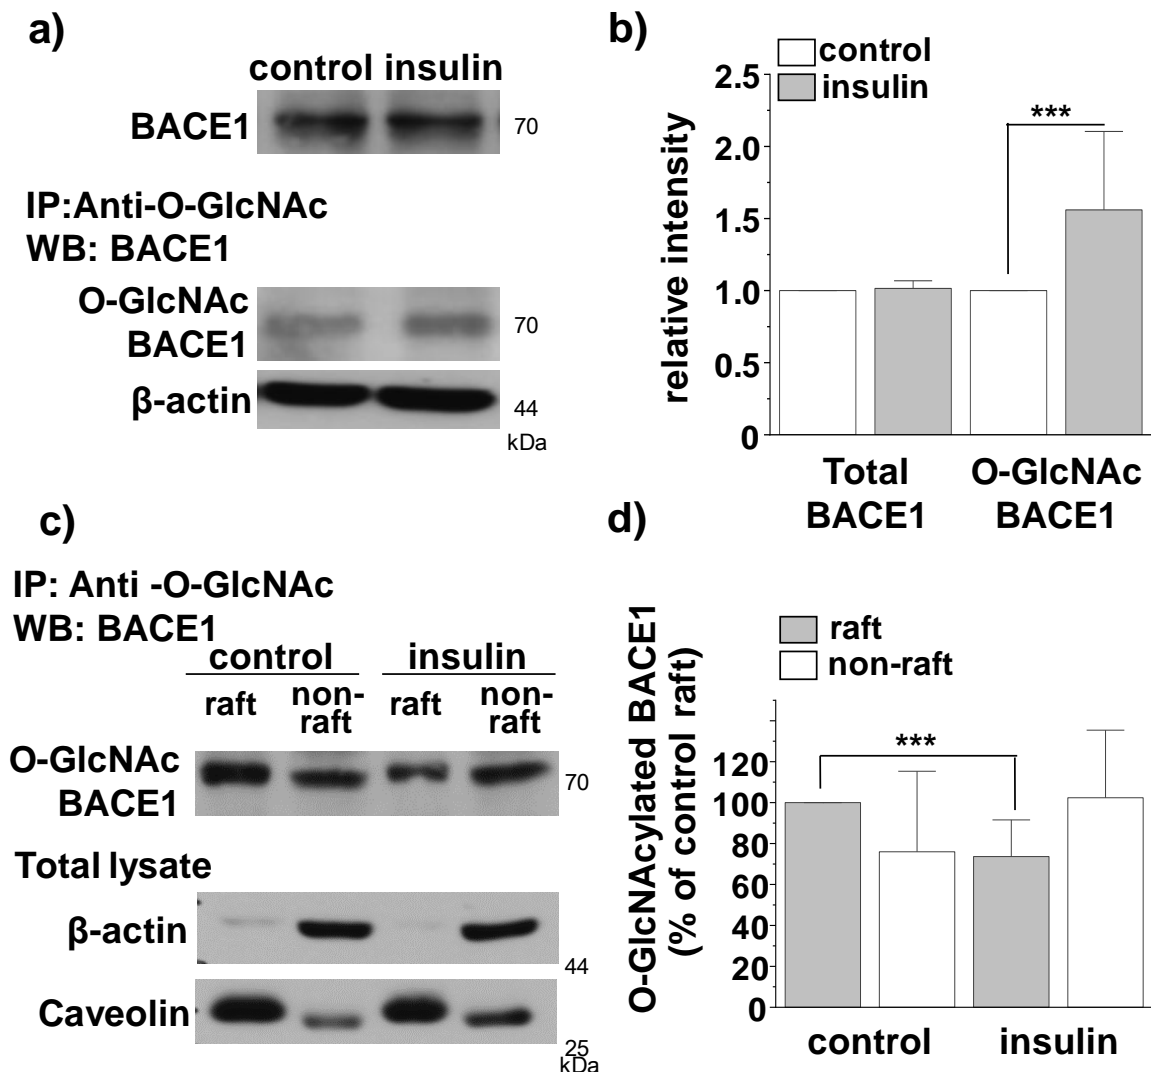

**Figure S9.** Insulin induced translocation of O-GlcNAcylated BACE1 from lipid raft to non-raft fractions. SH-SY5Y-APP/BACE1 cells were incubated with 1  $\mu$ M insulin for 2 h, and cell lysates were prepared. (a) A representative western blot shows the levels of total BACE1 and O-GlcNAcylated BACE1.  $\beta$ -actin was used as a loading control. (b) Bars correspond to the densitometric analysis of O-GlcNAcylated BACE1 levels (n=7). (c) SH-SY5Y-APP/BACE1 cells were incubated with 1  $\mu$ M insulin for 2 h, and then lipid raft and non-raft fractions were obtained. The combined fractions were immunoprecipitated with O-GlcNAc antibody, and then probed with BACE1 antibody. (d) O-GlcNAc BACE1 levels were compared to O-GlcNAc BACE1 level in raft fraction of control cells (n=7). One way ANOVA: \*\*\*,  $p < 0.001$ . All values represent mean  $\pm$  SEM.

**Figure S10**

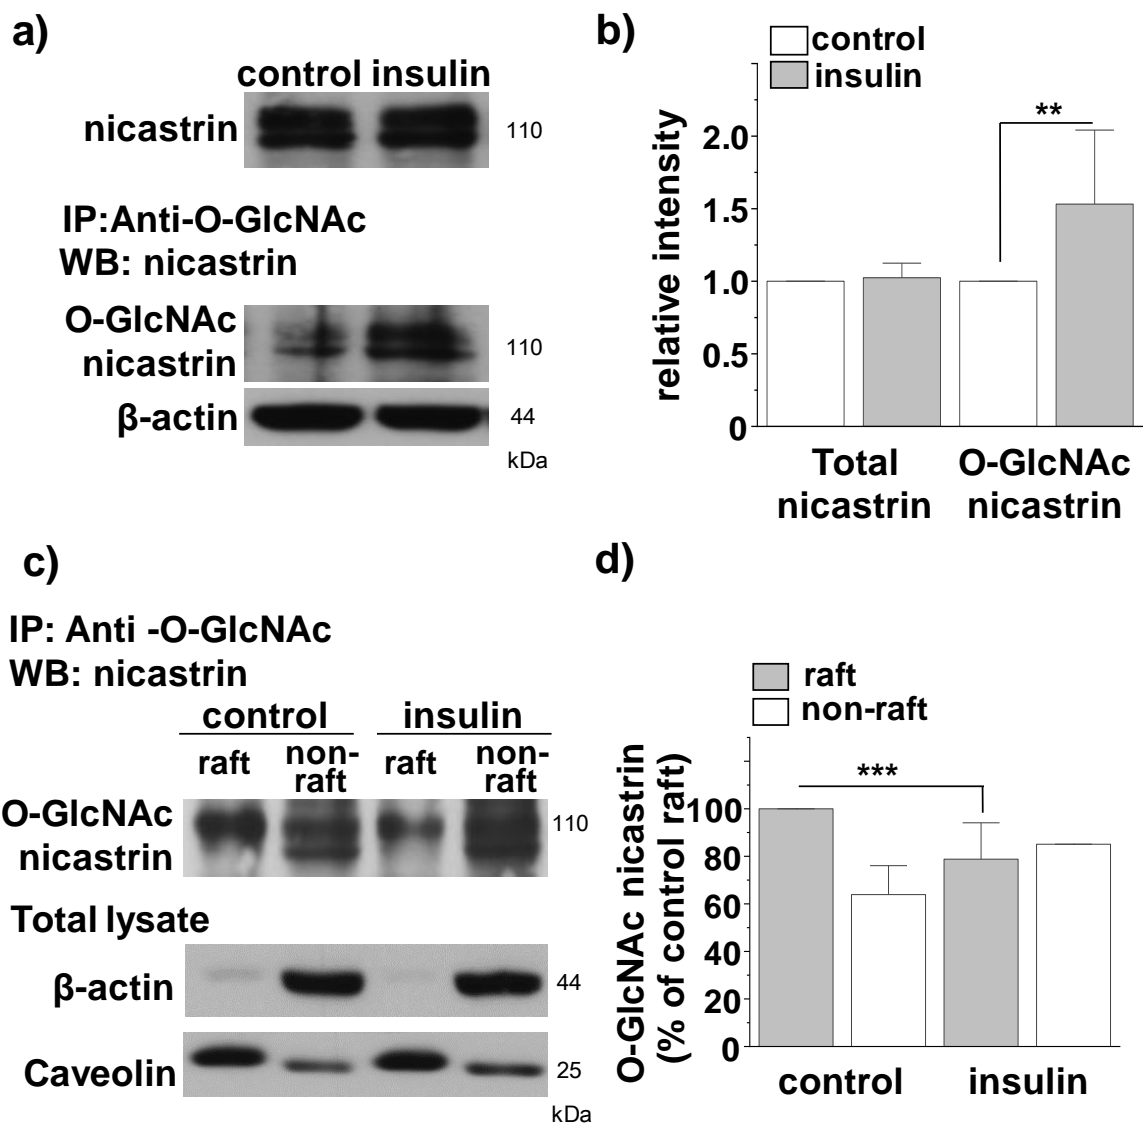

**Figure S10.** Insulin induced translocation of O-GlcNAcylated nicastrin from lipid raft to non-raft fractions. SH-SY5Y-APP/BACE1 cells were incubated with 1  $\mu$ M insulin for 2 h, and cell lysates were prepared. (a) A representative western blot shows the levels of total nicastrin and O-GlcNAcylated nicastrin.  $\beta$ -actin was used as a loading control. (b) Bars correspond to the densitometric analysis of O-GlcNAcylated nicastrin levels (n=7). (c) SH-SY5Y-APP/BACE1 cells were incubated with 1  $\mu$ M insulin for 2 h, and then lipid raft and non-raft fractions were obtained. The combined fractions were immunoprecipitated with O-GlcNAc antibody, and then probed with nicastrin antibody. (d) O-GlcNAc nicastrin levels were compared to O-GlcNAc nicastrin level in raft fraction of control cells (n=7). One way ANOVA: \*\*,  $p < 0.01$ ; \*\*\*,  $p < 0.001$ . All values represent mean  $\pm$  SEM.

**Figure S11**

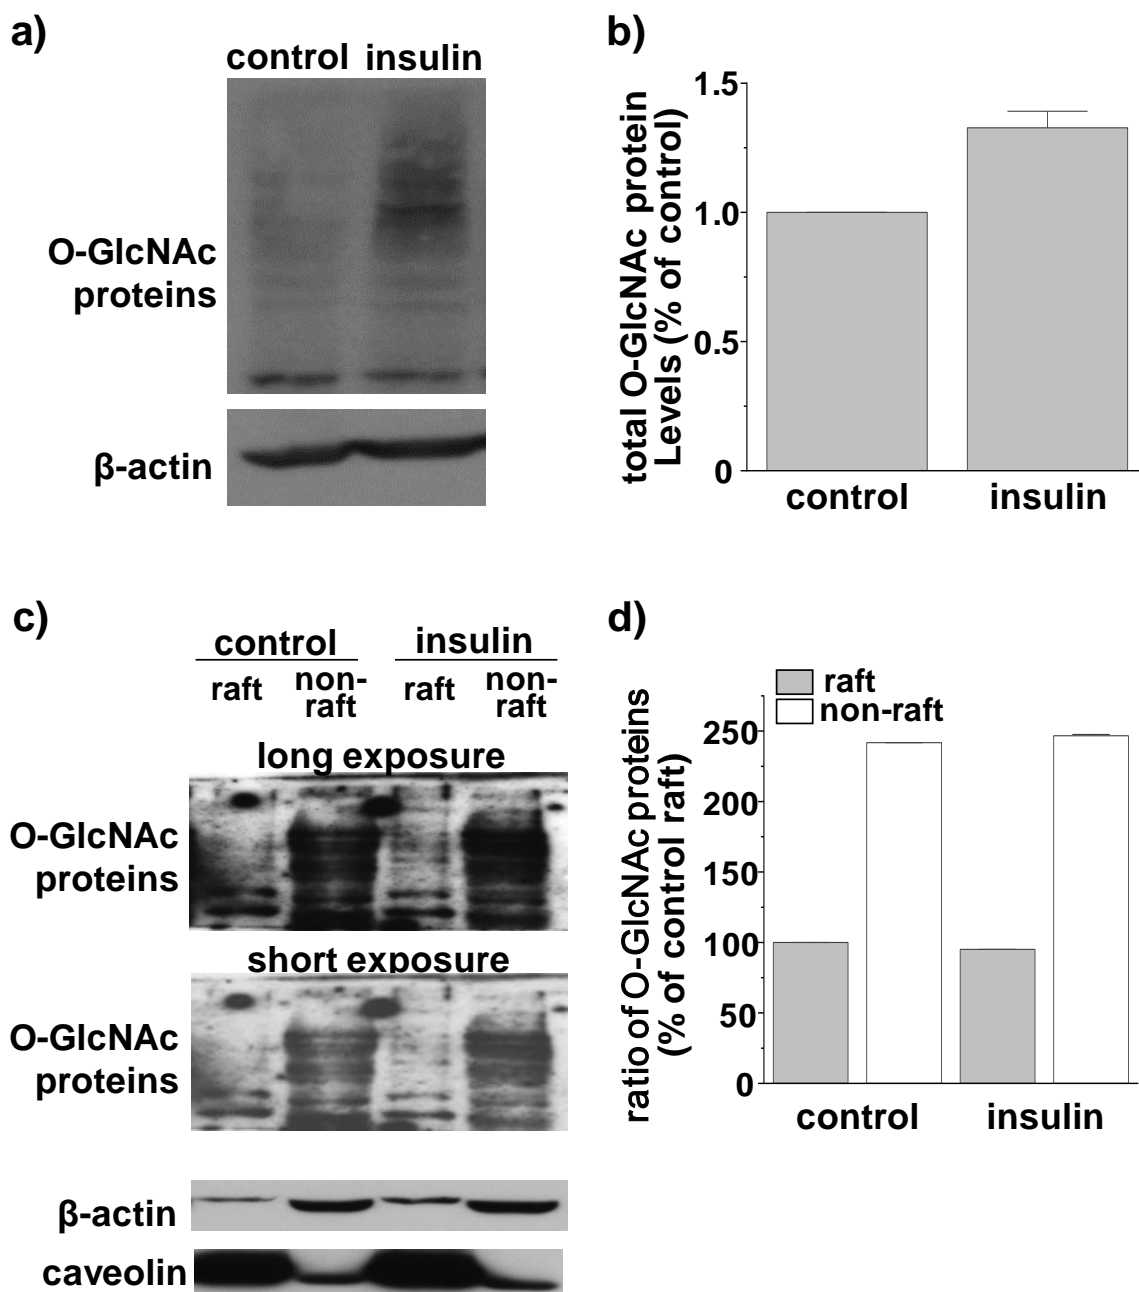

**Figure S11.** Effect of insulin on O-GlcNAcylated protein levels in lipid raft and non-raft fractions. SH-SY5Y-APP/BACE1 cells were incubated with insulin for 2 h, and cell lysates were obtained. (a) A representative western blot shows O-GlcNAcylated protein levels from control and insulin-treated cells. (b) Bars correspond to the densitometric analysis of O-GlcNAcylated protein levels (n=4, number of independent cell culture preparations). (c) Cell lysates were obtained and then fractionated into lipid raft and non-raft fractions by using discontinuous sucrose gradient method. A representative western blot shows O-GlcNAcylated protein levels with long- or short-exposure. Caveolin were used as markers for raft fractions. (d) O-GlcNAc protein levels were compared to O-GlcNAc protein level in raft fractions of control cells. (n=4, number of independent cell culture preparations).

**Figure S12**

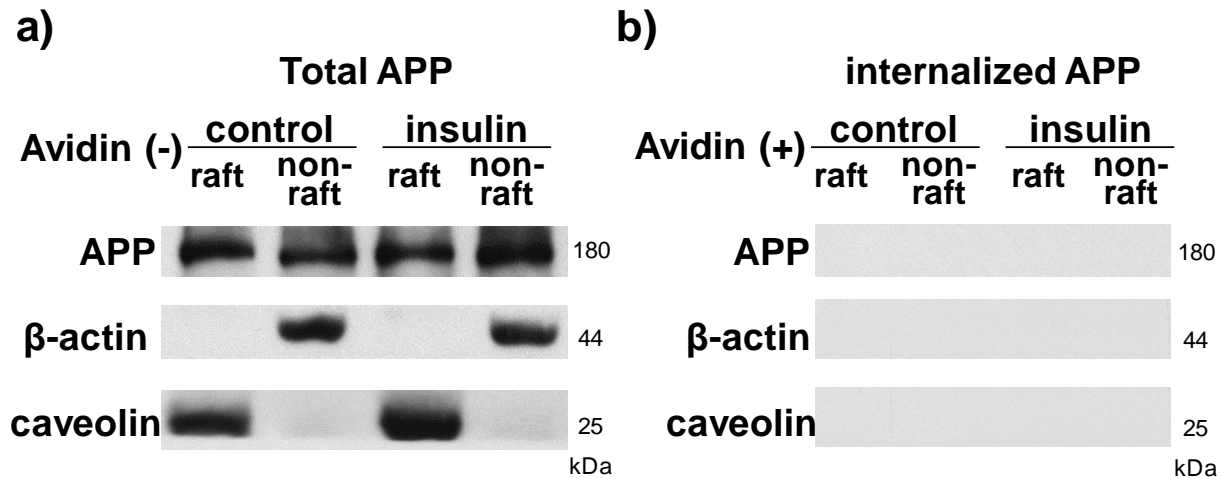

**Figure S12.** Internalized biotin-labeled proteins were originated from plasma membrane. SH-SY5Y-APP/BACE1 cells were incubated with insulin for 2 h. To confirm whether the internalized APP is originated from plasma membrane, cells were incubated with biotin to label surface proteins for 10 min at 4°C, and then remaining surface biotin was immediately removed with acidic buffer. Cells were then incubated at 37°C for 5 min to allow internalization. After internalization, biotin-labeled cell lysates were loaded onto a discontinuous sucrose density gradient to separate lipid raft and non-lipid raft fractions. We combined fractions 4 to 6 (lipid raft fractions) or fractions 8 to 12 (non-raft fractions). (a) Before pull-down with streptavidin beads, proteins in the same amount from lipid raft and non-raft fractions were loaded for western blots to detect total APP,  $\beta$ -actin, and caveolin. Caveolin was used as a lipid raft marker. (b) After pull-down with streptavidin beads, proteins in the same amount from lipid raft and non-raft fractions were loaded for western blots to detect internalized APP,  $\beta$ -actin, and caveolin.

**Figure S13**

**a)**

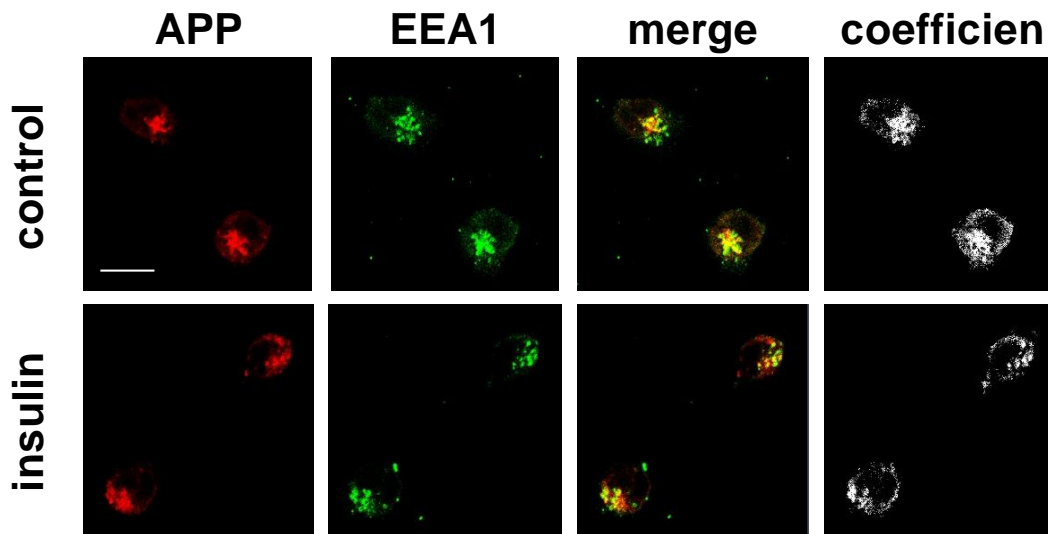

**b)**

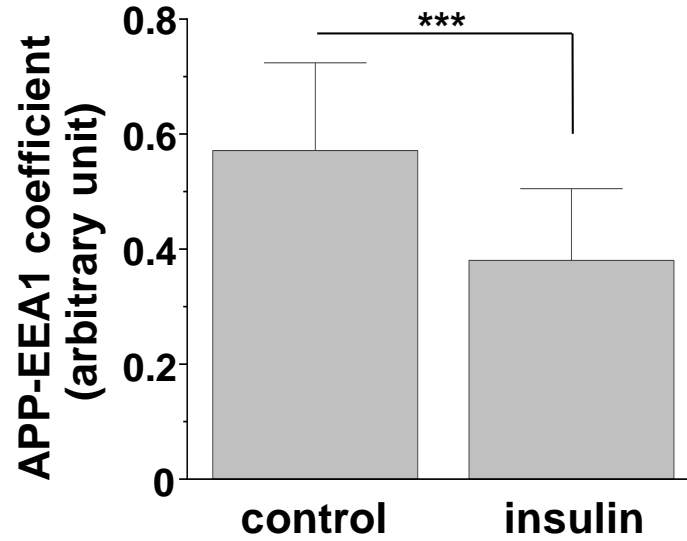

**Figure S13.** Insulin decreased the localization of internalized APP in early endosomes. SH-SY5Y-APP/BACE1 cells were treated with the 6E10 antibody at 4°C for labeling of APP in plasma membrane. After washing, cells were incubated at 37°C for 5 min to allow endocytosis. Then, cells were fixed, permeabilized, and incubated with EEA1 (marker for early endosome antibody). (a) Representative confocal image shows the co-localization of internalized APP (red) and EEA1 (green) at 5 min. (b) The coefficient of internalized APP and EEA1 was significantly decreased in insulin-treated cells compared to control cells. The intensities were quantified as the arbitrary unit by LSM710 microscope (Zeiss) using Zen software (n=20, number of cells. Randomly selected cells in 2 different experiments). The threshold was automatically set as the 60-100% value. (Manders' M1 coefficient: control,  $0.56629 \pm 0.02014$ ; insulin,  $0.37574 \pm 0.01645$ ; fraction of B overlapping A, image A: APP, image B: EEA1). Scale bar is 10  $\mu\text{m}$ . One way ANOVA: \*\*\*,  $p < 0.001$ . All values represent mean  $\pm$  SEM.
